# Supplementary material
Source: Springer Nature journal article supplement (https://www.springermedizin.de/resource/supplementary/12916_2009_214_MOESM12_ESM.pdf/9599408)

**Id, Sex, Study name**

**Relative Risk  
95% CI**

**Relative Risk  
95% CI**

**USA**

**13 M Morris Brown et al 1992**

**1.30 (0.70, 2.50)**

**18 M Schroeder et al 2002**

**1.06 (0.77, 1.45)**

**19 M Bracci and Holly 2005**

**4.00 (1.30, 12.00)**

**Subtotal (95% CI)**

**1.45 (0.81, 2.59)**

**SCANDINAVIA**

**5 M Swedish construction workers**

**0.77 (0.59, 1.01)**

**15 M Hardell et al 1994**

**1.50 (0.90, 2.50)**

**Subtotal (95% CI)**

**1.04 (0.54, 1.98)**

**Total (95% CI)**

**1.20 (0.83, 1.75)**

0.20

0.40

1.00

2.50

5.00

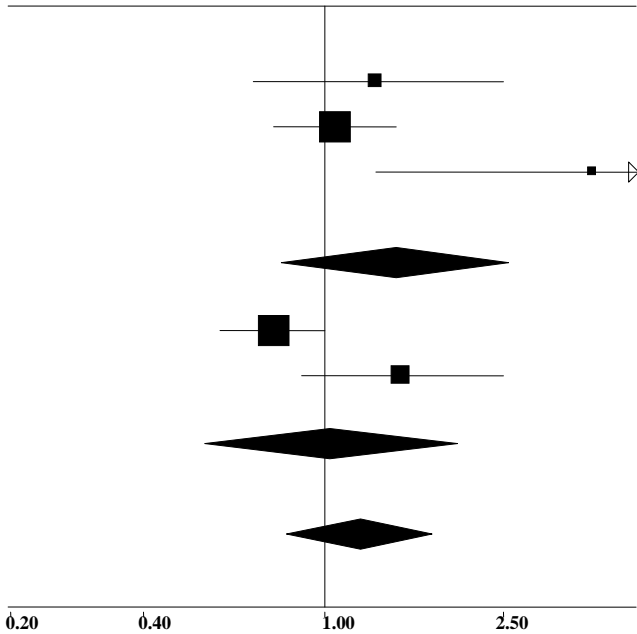

Supplement: MOESM12 [file 9599408]
